# Supplementary material
Source: publisher figshare collection journal article supplement (https://sage.figshare.com/ndownloader/files/22077879)
Supplement: Supplementary file 1 [file 22077879]

[1]Maximum Likelihood Phylogenetic Tree

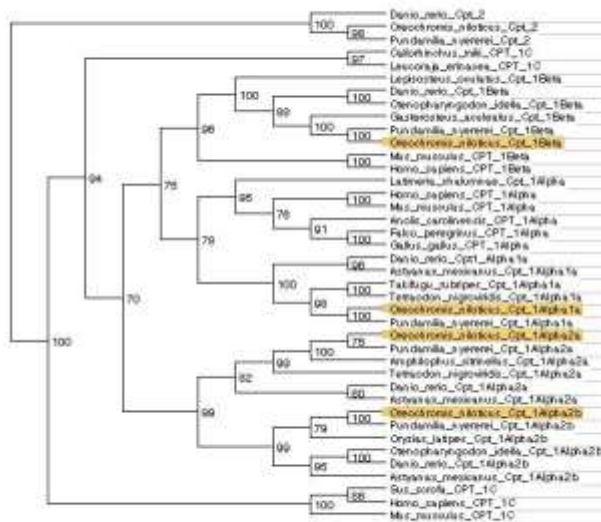

[2]Bayesian Phylogenetic Tree

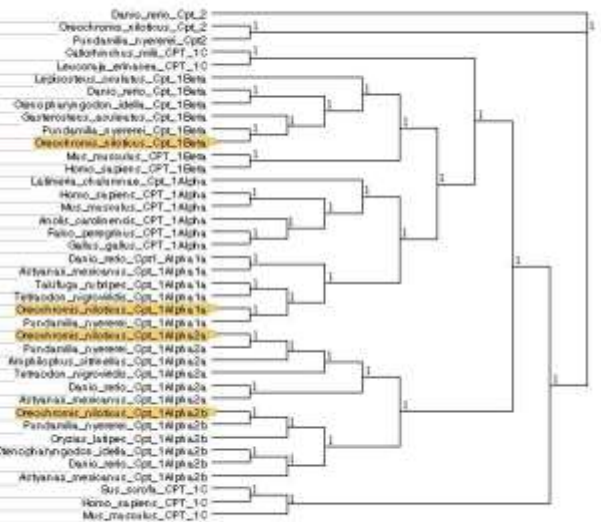

**Supplementary file 4.** Comparison of maximum likelihood and bayesian *cpt 1 / CPT 1* phylogenetic trees using tanglegram analysis
